# Supplementary material for: Zooming on dynamics of marine microbial communities in the phycosphere of Akashiwo sanguinea (Dinophyta) blooms
Source: PubMed Central journal article supplement — Mol Ecol. 2020 Nov 14;30(1):207–21. doi: 10.1111/mec.15714 (PMC7839783; doi:10.1111/mec.15714), 2020-11-14
Supplement: MEC-30-207-s001.pdf [file MEC-30-207-s001.pdf]

**Supplementary information**

**Zooming on dynamics of marine microbial communities in the phycosphere of *Akashiwo sanguinea*  
(Dinophyta) blooms**

Running title: Microbial dynamics in *Akashiwo sanguinea* HABs

Junsu Kang<sup>1,2</sup>, Joon Sang Park<sup>1</sup>, Seung Won Jung<sup>1,\*</sup>, Hyun-Jung Kim<sup>1</sup>, Hyoung Min Joo<sup>3</sup>, Donhyug Kang<sup>4</sup>,  
Hyojeong Seo<sup>2</sup>, Sunju Kim<sup>2</sup>, Min-Chul Jang<sup>5</sup>, Kyun-Woo Lee<sup>6</sup>, Seok Jin Oh<sup>2</sup>, Sukchan Lee<sup>7</sup>, Taek-Kyun Lee<sup>8,\*\*</sup>,

<sup>1</sup>Library of Marine Samples, Korea Institute of Ocean Science & Technology, Geoje, 53201, <sup>2</sup>Department of Oceanography, Pukyong National University, Busan 48513, Republic of Korea, <sup>3</sup>Division of Polar Ocean Science, Korea Polar Research Institute, Incheon 21990, Republic of Korea, <sup>4</sup>Maritime Security Research Center, Korea Institute of Ocean Science & Technology, Busan 49111, Republic of Korea, <sup>5</sup>Ballast Water Research Center, Korea Institute of Ocean Science & Technology, Geoje, 53201, Republic of Korea, <sup>6</sup>Marine Biotechnology Research Center, Korea Institute of Ocean Science & Technology, Busan 49111, Republic of Korea, <sup>7</sup>Department of Genetic Engineering, Sungkyunkwan University, Suwon, Republic of Korea, <sup>8</sup>Risk Assessment Research Center, Korea Institute of Ocean Science & Technology, Geoje 53201, Republic of Korea

\*Corresponding author: S.-W. Jung, diatoms@kiost.ac.kr, Fax: +82-55-639-8429

\*\* Co-corresponding author: T.K. Lee, tklee@kiost.ac.kr, Fax: +82-55-635-3913

20 **Supplementary Figures**

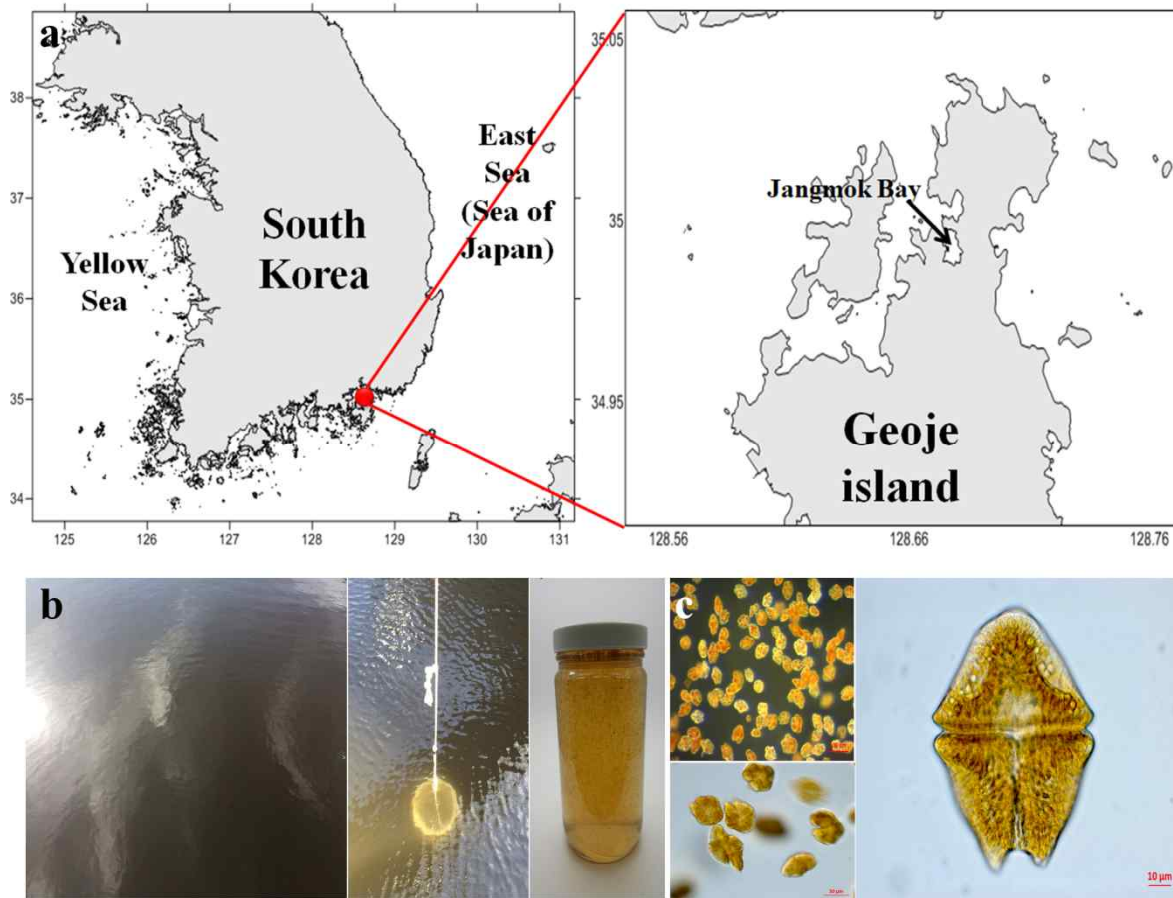

21

22 **Supplementary Figure 1.** Sampling site located in Jangmök Bay Time-series Monitoring Site (JBTMS: 34° 59'

23 37'' N and 128° 40' 27'' E), a semi-closed bay on the southern coast of South Korea, a, b, sea water colour in

24 *Akashiwo sanguinea* bloom; c, light microscopic observation of *Akashiwo sanguinea* cells.

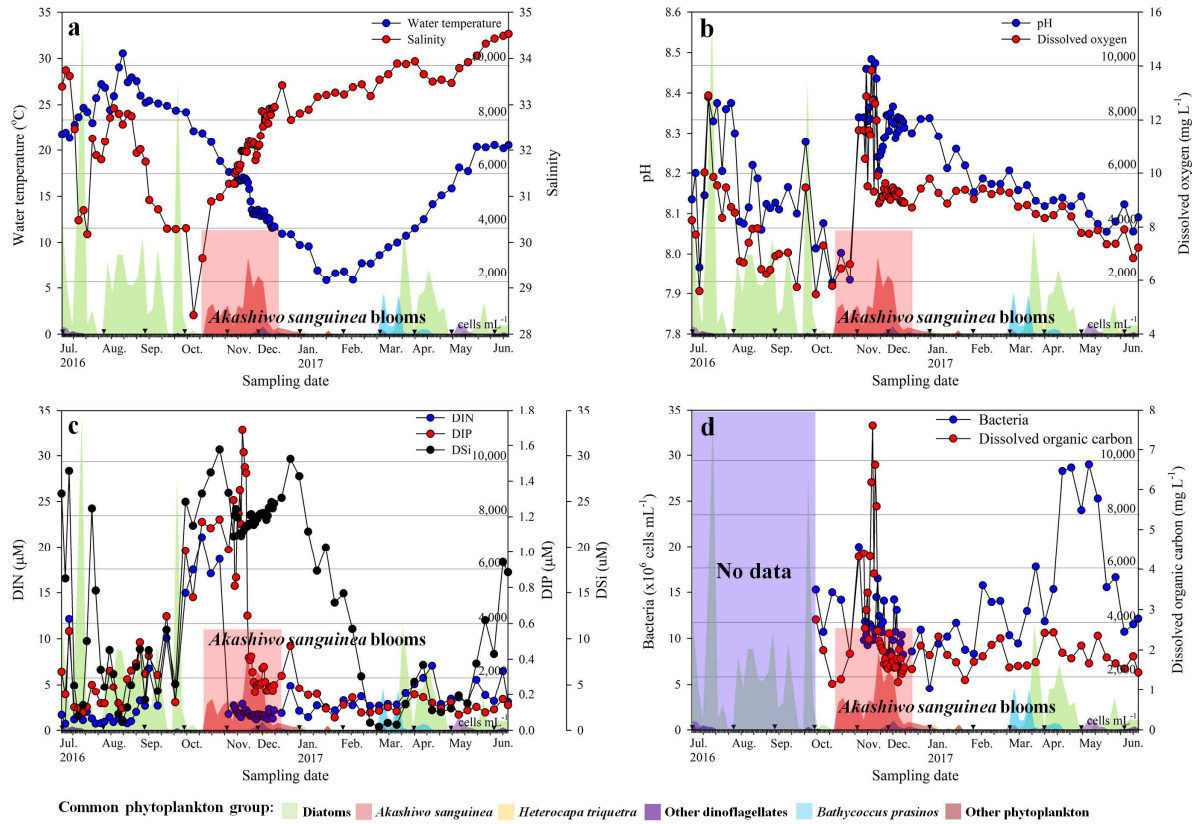

25

26 **Supplementary Figure 2.** Weekly and daily changes in the measured environmental factors and phytoplankton  
 27 communities in Jangmok Bay Time-series Monitoring Site (JBTMS) from June 2016 to June 2017. a, water  
 28 temperature and salinity; b, pH and dissolved oxygen; c, dissolved inorganic nitrogen (DIN), dissolved  
 29 inorganic phosphorus (DIP), and dissolved silica (DSi); d, total bacterial abundance and dissolved organic  
 30 carbon concentration.

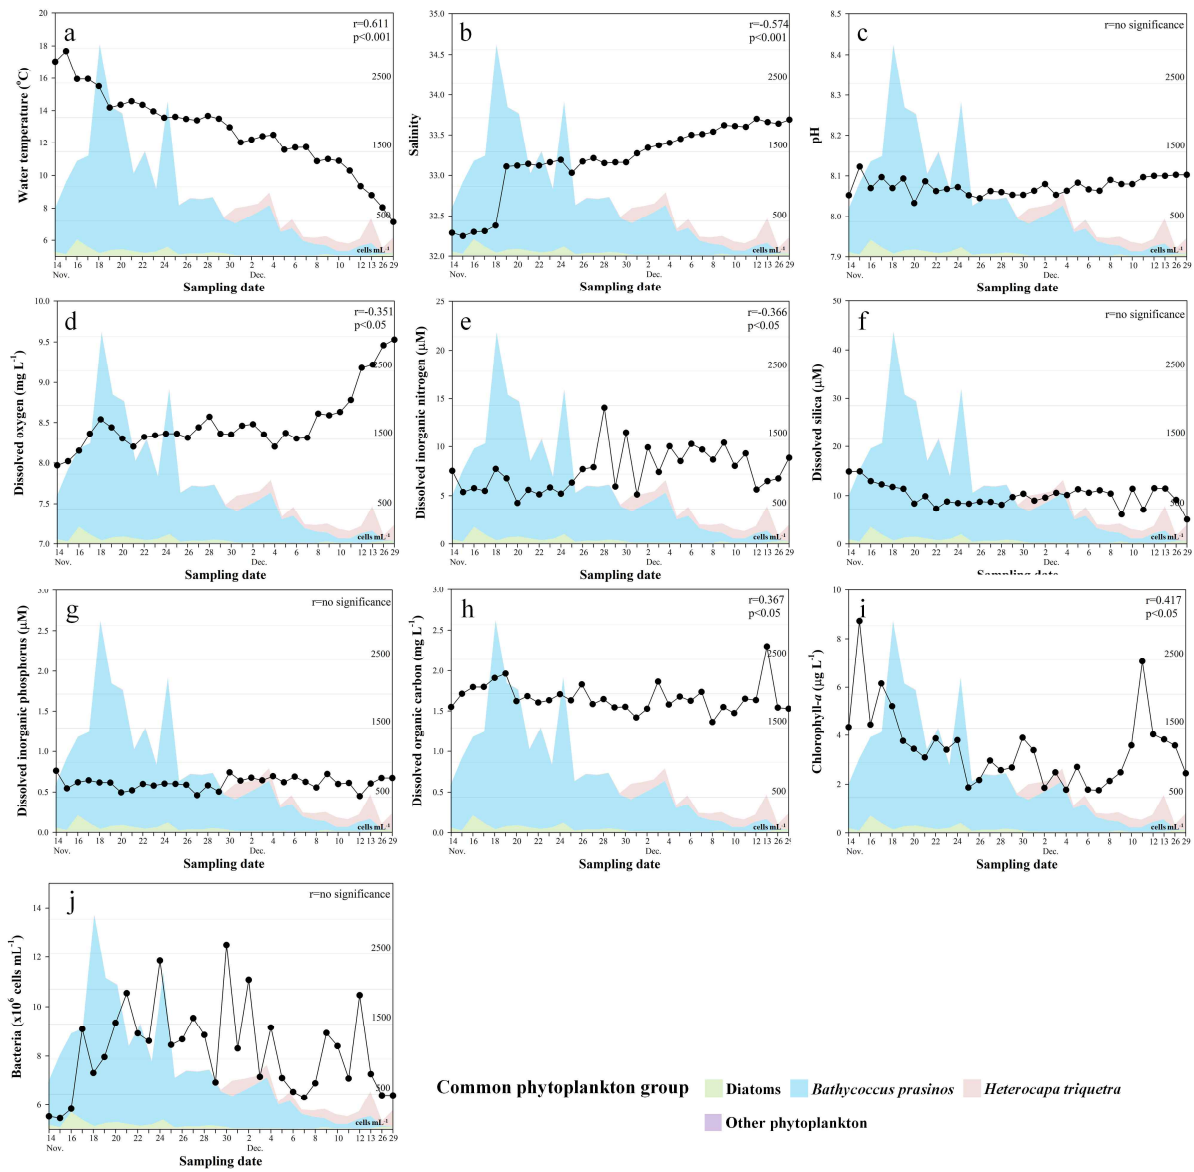

31

32 **Supplementary Figure 3.** Daily changes in environmental factors under dominant presence of the pico-sized  
 33 green alga, *Bathycoccus prasinos* in 2017. a, water temperature; b, salinity; c, pH; d, dissolved oxygen; e,  
 34 dissolved inorganic nitrogen; f, dissolved silica; g, dissolved inorganic phosphorus; h, dissolved organic  
 35 carbon; i, chlorophyll-*a*; j, total bacteria abundance. Coloured areas in the figure correspond to the common  
 36 phytoplankton groups in 2017. *r* value in each figure (upper right) indicates Pearson correlation coefficient  
 37 between changes in each environmental factor and *B. prasinos* abundance.

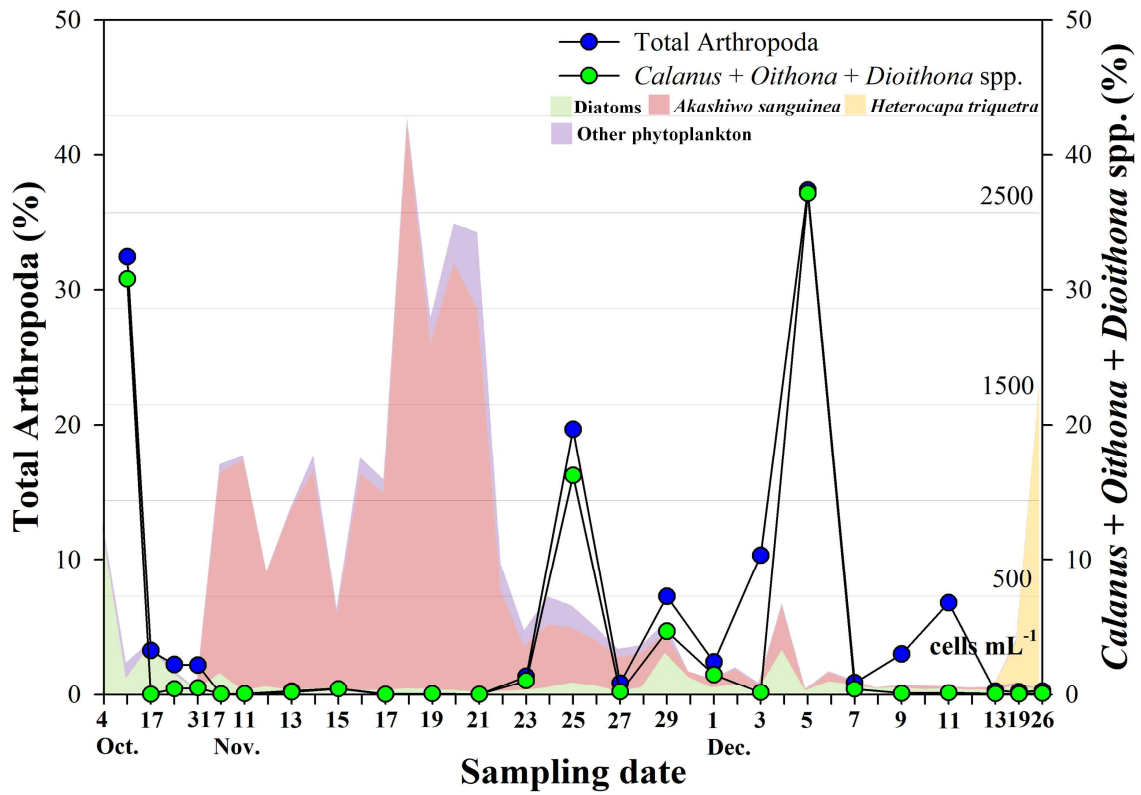

38

39 **Supplementary Figure 4.** Daily changes in relative abundance (%) of the microzooplankton (total Arthropoda)  
 40 communities and *Akashiwo sanguinea* feeding herbivores (*Calanus* spp. + *Oithona* spp. + *Dioithona* spp.)  
 41 obtained from metagenomic next-generation sequencing during *Akashiwo sanguinea* blooms in 2016, The  
 42 coloured areas in the figure correspond to the common phytoplankton groups in 2016.

43 **Supplementary Tables**44 **Supplementary Table 1.** Experimental information for PCR amplification of V3-V4 regions in 16s rDNA

| Target region                        | Step          | Primer                                                                                                                                                                                                                                          |                                                                                               | PCR reaction mixtures<br>(total 25- $\mu$ L)                                                                                                                                                                                                                                           | PCR condition                                                                                                                                                                                                            | Reference |
|--------------------------------------|---------------|-------------------------------------------------------------------------------------------------------------------------------------------------------------------------------------------------------------------------------------------------|-----------------------------------------------------------------------------------------------|----------------------------------------------------------------------------------------------------------------------------------------------------------------------------------------------------------------------------------------------------------------------------------------|--------------------------------------------------------------------------------------------------------------------------------------------------------------------------------------------------------------------------|-----------|
|                                      |               | Forward                                                                                                                                                                                                                                         | Reverse                                                                                       |                                                                                                                                                                                                                                                                                        |                                                                                                                                                                                                                          |           |
| 16s<br>rDNA<br><br>(V3-V4<br>region) | First<br>PCR  | Illumina preadapter<br>+Sequencing primer<br>sequence+341F (5'-<br>CCTACGGGN<br>GGCWGCAG-3')                                                                                                                                                    | Illumina preadapter<br>+Sequencing primer<br>sequence+800R (5'-<br>TACCAGGGT<br>ATCTAATCC-3') | 200 $\mu$ mol L <sup>-1</sup> each dNTP, 1.5<br>mmol L <sup>-1</sup> MgCl <sub>2</sub> , 0.3 $\mu$ mol L <sup>-1</sup><br>each primer, 2.5 U Taq DNA<br>polymerase (TaKaRa, EX Taq,<br>Kyoto, Japan), and DNA<br>template (20 ng $\mu$ L <sup>-1</sup> )                               | initial denaturation step at 95°C for 3 min, followed<br>by 35 cycles of denaturation at 95°C for 10 s,<br>annealing at 52°C for 45 s, and extension at 72°C for 1<br>min, and a final extension step of 72°C for 5 min. |           |
|                                      | Second<br>PCR | Illumina preadapter<br>+Sequencing primer<br>sequence+341F (5'-<br>CCTACGGGN<br>GGCWGCAG-3')                                                                                                                                                    | Illumina preadapter<br>+Sequencing primer<br>sequence+800R (5'-<br>TACCAGGGT<br>ATCTAATCC-3') | 200 $\mu$ mol L <sup>-1</sup> each dNTP, 1.5<br>mmol L <sup>-1</sup> MgCl <sub>2</sub> , 0.3 $\mu$ mol L <sup>-1</sup><br>each primer, 2.5 U Taq DNA<br>polymerase (TaKaRa, EX Taq,<br>Kyoto, Japan), and DNA<br>template (800 ng), and Nextera<br>XT index Kit (Illumina, CA,<br>USA) | initial denaturation step at 95°C for 3 min, followed<br>by 12 cycles of denaturation at 95°C for 10 s,<br>annealing at 52°C for 45 s, and extension at 72°C for 1<br>min, and a final extension step of 72°C for 5 min. | 1, 2      |
|                                      | Pooling       | Triplicate reaction products (same amount) were pooled and purified using an Qiaquick PCR purification Kit (No. 28104, Qiagen Inc.).<br>Their DNA concentration was measured in a Bio-analyzer 2100 (Agilent Technologies, Palo Alto, CA, USA). |                                                                                               |                                                                                                                                                                                                                                                                                        |                                                                                                                                                                                                                          |           |

45

46 **Supplementary Table 2.** Experimental information for PCR amplification of V4-V5 regions in 18s rDNA

| Target region           | Step       | Primer                                                                                                                                                                                                                                      |                                                                                               | PCR reaction mixtures (25- $\mu$ L)                                                                                                                                                                                                                           | PCR condition                                                                                                                                                                                                   | Reference |
|-------------------------|------------|---------------------------------------------------------------------------------------------------------------------------------------------------------------------------------------------------------------------------------------------|-----------------------------------------------------------------------------------------------|---------------------------------------------------------------------------------------------------------------------------------------------------------------------------------------------------------------------------------------------------------------|-----------------------------------------------------------------------------------------------------------------------------------------------------------------------------------------------------------------|-----------|
|                         |            | Forward                                                                                                                                                                                                                                     | Reverse                                                                                       |                                                                                                                                                                                                                                                               |                                                                                                                                                                                                                 |           |
| 18s rDNA (V4-V5 region) | First PCR  | Illumina preadapter +Sequencing primer<br>TAREuk454FWD1<br>(5'-CCAGCASCYGCG GTAATTGG-3')                                                                                                                                                    | Illumina preadapter +Sequencing primer<br>sequence+TAREuk<br>REV3 (5'-ACTTTC GTTCTTGATYRA-3') | 200 $\mu$ mol L <sup>-1</sup> each dNTP, 1.5 mmol L <sup>-1</sup> MgCl <sub>2</sub> , 0.3 $\mu$ mol L <sup>-1</sup> each primer, 2.5 U Taq DNA polymerase (TaKaRa, EX Taq, Kyoto, Japan), and DNA template (20 ng $\mu$ L <sup>-1</sup> )                     | initial denaturation step at 95°C for 3 min, followed by 35 cycles of denaturation at 95°C for 10 s, annealing at 52°C for 45 s, and extension at 72°C for 1 min, and a final extension step of 72°C for 5 min. |           |
|                         | Second PCR | Illumina preadapter +Sequencing primer<br>TAREuk454FWD1<br>(5'-CCAGCASCYGCG GTAATTGG-3')                                                                                                                                                    | Illumina preadapter +Sequencing primer<br>sequence+TAREuk<br>REV3 (5'-ACTTTC GTTCTTGATYRA-3') | 200 $\mu$ mol L <sup>-1</sup> each dNTP, 1.5 mmol L <sup>-1</sup> MgCl <sub>2</sub> , 0.3 $\mu$ mol L <sup>-1</sup> each primer, 2.5 U Taq DNA polymerase (TaKaRa, EX Taq, Kyoto, Japan), DNA template (600 ng), and Nextera XT index Kit (Illumina, CA, USA) | initial denaturation step at 95°C for 3 min, followed by 12 cycles of denaturation at 95°C for 10 s, annealing at 52°C for 45 s, and extension at 72°C for 1 min, and a final extension step of 72°C for 5 min. | 3, 4      |
|                         | Pooling    | Triplicate reaction products (same amount) were pooled and purified using a Qiaquick PCR purification Kit (No. 28104, Qiagen Inc.). Their DNA concentration was measured in a Bio-analyzer 2100 (Agilent Technologies, Palo Alto, CA, USA). |                                                                                               |                                                                                                                                                                                                                                                               |                                                                                                                                                                                                                 |           |

48 **Supplementary Table 3.** Summary of numbers of read counts and operational taxonomic units (OTUs) of bacterial community (16s rDNA V3-V4 regions) obtained from  
 49 metagenomic next-generation sequencing analysis and the alpha-diversity indices of the Jangmok Bay Time-series Monitoring Site in 2016 (*Akashiwo sanguinea* bloom)  
 50 and 2017 (No *A. sanguinea* bloom). Group I–IV in 2016 and Group I and II in 2017 were obtained from nMDS analysis presented in Figs. 2a and 2b.

| Group     | Date                      | Total sequence (mean)                 | Read Count (mean)           | OTUs (mean)   | Chao1 richness (mean) | Shannon diversity (mean) | Simpson evenness (mean) | Remark                               |
|-----------|---------------------------|---------------------------------------|-----------------------------|---------------|-----------------------|--------------------------|-------------------------|--------------------------------------|
| Group I   | Oct., 4 - 31, 2016        | 32,298,622-62,271,417<br>(46,112,019) | 73,321-140,807<br>(104,034) | 261-406 (313) | 407-677 (489)         | 2.804-3.680<br>(3.316)   | 0.564-0.773<br>(0.678)  | Before <i>A. sanguinea</i> bloom     |
| Group II  | Nov., 7 – 28, 2016        | 7,696,433-44,490,558<br>(23,987,481)  | 17,197-99,823<br>(53,723)   | 113-220 (162) | 157-343 (242)         | 2.373-4.791<br>(3.791)   | 0.538-0.930<br>(0.821)  | During <i>A. sanguinea</i> bloom     |
| Group III | Nov., 13 – 14, 2016       | 7,397,953-13,327,844<br>(10,362,899)  | 16,499-29,667<br>(23,083)   | 104-119 (112) | 178-199 (188)         | 2.988-3.107<br>(3.047)   | 0.798-0.807<br>(0.802)  |                                      |
| Group IV  | Nov., 29 – Dec., 26, 2016 | 23,022,820-82,174,372<br>(54,400,274) | 51,437-183,273<br>(121,405) | 179-296 (241) | 245-433 (351)         | 4.380-4.837<br>(4.614)   | 0.893-0.939<br>(0.917)  | After <i>A. sanguinea</i> bloom      |
| Group I   | Nov., 14 – Dec., 13, 2017 | 8,656,023-69,720,710<br>(31,791,259)  | 19,470-156,620<br>(71,464)  | 135-310 (207) | 176-434 (288)         | 3.539-4.295<br>(3.935)   | 0.759-0.889<br>(0.823)  | Dominance of <i>B. prasinus</i>      |
| Group II  | Dec., 19 – 26, 2017       | 6,804,524-7,552,004<br>(7,178,264)    | 15,400-17,180<br>(16,290)   | 105-109 (107) | 167-169 (168)         | 2.971-3.025<br>(2.998)   | 0.662-0.768<br>(0.715)  | After decrease of <i>B. prasinus</i> |

51



52 **Supplementary Table 4.** Summary of numbers of read counts and operational taxonomic units (OTUs) of Nucleo Cytoplasmic Large DNA Viruses (NCLDV) obtained  
53 from metagenomic next-generation sequencing analysis of the Jangmok Bay Time-series Monitoring Site in 2016 (*Akashiwo sanguinea* blooming period) and 2017 (No *A.*  
54 *sanguinea* bloom period). Groups I–IV were obtained from nMDS analysis presented in Figs. 4a and 4b.

| Group     | Date                                                | Total sequence (mean)                          | Number of Virus contigs (mean) | Number of NCLDVs contigs (mean) | NCLDVs OTUs (mean) | Remark                                             |
|-----------|-----------------------------------------------------|------------------------------------------------|--------------------------------|---------------------------------|--------------------|----------------------------------------------------|
| Group I   | Oct.24-31,<br>Nov.15, 2016                          | 1,688,012,192-2,358,455,848<br>(1,986,633,842) | 1,557-1,643 (1,605)            | 1,080-1,241 (1,139)             | 92-95 (94)         | Before <i>A. sanguinea</i> bloom                   |
| Group II  | Nov. 7-11, 21,<br>2016                              | 1,464,097,818-1,948,331,006<br>(1,770,470,006) | 498-505 (463)                  | 229-327 (282)                   | 57-69 (64)         | Early <i>A. sanguinea</i> bloom                    |
| Group III | Nov. 17, 2016                                       | 2,233,117,474                                  | 361                            | 179                             | 52                 |                                                    |
| Group IV  | Oct.10-17,<br>Nov.13, 19,<br>Nov.23-Dec.26,<br>2016 | 1,171,719,382-2,208,330,660<br>(1,793,789,254) | 674-2,594 (1,407)              | 443-1,962 (1,072)               | 72-105 (87)        | Before, Peak and decline <i>A. sanguinea</i> bloom |
| Group I   | Nov., 15-Dec.19,<br>2017                            | 1,541,147,082-2,348,387,360<br>(1,935,432,940) | 3,272-5,260 (4,169)            | 2,789-4,161 (3388)              | 98-117 (108)       | Dominance of <i>B. prasinus</i>                    |
| Group II  | Dec.26, 2017                                        | 2,382,864,316                                  | 5,107                          | 3,570                           | 112                | After decrease of <i>B. prasinus</i>               |

55

56 **Supplementary Table 5.** Summary of number of read counts and operational taxonomic units (OTUs) of eukaryotic plankton community (18s rDNA V4-V5 regions) at  
57 size-fractions of >10  $\mu\text{m}$  (focused on eukaryotic plankton and dinospores of *Amoebophrya* sp. in *A. sanguinea* cells) and 2–0.2  $\mu\text{m}$  (focused on free-living *Amoebophrya*  
58 spp. and nano-sized phytoplankton) obtained from metagenomic next-generation sequencing analysis, and alpha-diversity indices of the Jangmok Bay Time-series  
59 Monitoring Site in 2016 (*Akashiwo sanguinea* blooming period). Groups I–III (>10  $\mu\text{m}$ ) and Groups I–III (2-0.2  $\mu\text{m}$ ) were obtained from nMDS analysis .

| Filter size         | Group     | Sampling date           | Total sequence (mean)                 | Read Count (mean)           | OTUs (mean)   | Chao1 richness (mean) | Shannon diversity (mean) | Simpson evenness (mean) | Remark                           |
|---------------------|-----------|-------------------------|---------------------------------------|-----------------------------|---------------|-----------------------|--------------------------|-------------------------|----------------------------------|
| > 10 $\mu\text{m}$  | Group I   | Oct. 10-31, 2016        | 12,478,827-47,051,009<br>(26,192,373) | 30,295-113,485<br>(63,407)  | 208-289 (256) | 273-353 (328)         | 3.373-4.983<br>(4.216)   | 0.715-0.919<br>(0.849)  | Before <i>A. sanguinea</i> bloom |
|                     | Group II  | Nov.-7-23, 2016         | 11,388,538-69,954,522<br>(48,129,687) | 27,244-167,974<br>(115,268) | 59-160 (112)  | 101-243 (195)         | 0.108-0.805<br>(0.313)   | 0.018-0.275<br>(0.076)  | During <i>A. sanguinea</i> bloom |
|                     | Group III | Nov.25-Dec.26           | 6,547,198-107,637,393<br>(49,803,387) | 15,642-257,281<br>(118,832) | 114-307 (208) | 193-403 (300)         | 0.758-2.437<br>(1.868)   | 0.191-0.693<br>(0.521)  | After <i>A. sanguinea</i> bloom  |
| 2-0.2 $\mu\text{m}$ | Group I   | Nov. 11-21, 2016        | 20,334,734-33,137,157<br>(27,951,474) | 48,658-78,547<br>(66,663)   | 144-234 (185) | 156-286 (240)         | 0.656-2.674<br>(1.842)   | 0.119-0.716<br>(0.455)  | During <i>A. sanguinea</i> bloom |
|                     | Group II  | Nov. 23-Dec.26, 2016    | 20,987,838-49,915,365<br>(30,248,955) | 50,178-118,849<br>(72,405)  | 216-329 (282) | 229-389 (327)         | 2.084-5.916<br>(4.560)   | 0.464-0.964<br>(0.845)  | After <i>A. sanguinea</i> bloom  |
|                     | Group III | Dec. 13, 2016           | 9,663,458                             | 23,109                      | 201           | 214                   | 5.940                    | 0.960                   |                                  |
|                     | Group I   | Nov. 15 - Dec. 26, 2017 | 28,278,227-61,578,514<br>(45,329,554) | 68,221-147,961<br>(108,980) | 176-392 (306) | 257-454 (367)         | 2.065-5.285<br>(3.970)   | 0.517-0.942<br>(0.820)  | No <i>A. sanguinea</i> bloom     |
|                     | Group II  | Nov. 17, 2017           | 17,867,369                            | 42,759                      | 207           | 224                   | 5.698                    | 0.951                   |                                  |

60 **Supplementary Table 6.** Abbreviations and node sizes of significant factors ( $P < 0.01$  and  $Q < 0.05$ ) in the  
 61 Network analysis displayed in Fig. 7.

| 2016                                      |                 |           | 2017                               |                 |           | Classification               |
|-------------------------------------------|-----------------|-----------|------------------------------------|-----------------|-----------|------------------------------|
| Factor                                    | Abbreviation    | Node size | Factor                             | Abbreviation    | Node size |                              |
| Temperature                               | Temp.           | 0.47      | Temperature                        | Temp.           | 0.47      | Environmental factor         |
| Salinity                                  | Sal.            | 0.63      | Salinity                           | Sal.            | 0.67      |                              |
| pH                                        | pH              | 0.48      | pH                                 | pH              | 0.39      |                              |
| Dissolved inorganic phosphorus            | DIP             | 0.26      | Dissolved inorganic nitrogen       | DIN             | 0.37      |                              |
| Dissolved organic carbon                  | DOC             | 0.23      | Dissolved organic carbon           | DOC             | 0.34      |                              |
| Chlorophyll- <i>a</i>                     | Chl- <i>a</i>   | 0.29      | Chlorophyll- <i>a</i>              | Chl- <i>a</i>   | 0.29      |                              |
| Dissolved oxygen                          | DO              | 0.25      | Dissolved oxygen                   | DO              | 0.35      |                              |
| Dissolved silica                          | DSi             | 0.73      |                                    |                 |           |                              |
| <i>Akashiwo sanguinea</i>                 | <i>A.san.</i>   | 0.63      | <i>Adenoides eludens</i>           | <i>A.elu.</i>   | 0.08      |                              |
| <i>Heterocapsa rotundata</i>              | <i>H.rot.</i>   | 0.23      | <i>Akashiwo sanguinea</i>          | <i>A.san.</i>   | 0.21      |                              |
| Uncultured Stramenopile                   | U.Str.          | 0.28      | <i>Bathycoccus prasinos</i>        | <i>B.pra.</i>   | 0.49      |                              |
|                                           |                 |           | <i>Chaetoceros tenuissimus</i>     | <i>C.ten.</i>   | 0.28      |                              |
|                                           |                 |           | <i>Chaetoceros</i> sp.             | <i>Cha.sp.</i>  | 0.30      |                              |
|                                           |                 |           | <i>Heterocapsa rotundata</i>       | <i>H.rot.</i>   | 0.36      |                              |
|                                           |                 |           | <i>Minutocellus</i> sp.            | <i>Min.sp.</i>  | 0.13      |                              |
|                                           |                 |           | <i>Teleaulax amphioxeia</i>        | <i>T.amp.</i>   | 0.44      |                              |
|                                           |                 |           | <i>Teleaulax</i> sp.               | <i>Tel.sp.</i>  | 0.40      |                              |
|                                           |                 |           | <i>Tetraselmis</i> sp.             | <i>Tet.sp.</i>  | 0.13      |                              |
|                                           |                 |           | <i>Thalassiosira oceanica</i>      | <i>T.oce.</i>   | 0.43      |                              |
|                                           |                 |           | <i>Pyramimonas australis</i>       | <i>P.aus.</i>   | 0.35      |                              |
| <i>Acartia omorii</i>                     | <i>A.omo.</i>   | 0.13      | <i>Clytia hemisphaerica</i>        | <i>C.hem.</i>   | 0.07      | Heterotroph                  |
| <i>Acartia steueri</i>                    | <i>A.ste.</i>   | 0.09      | <i>Laackmanniella prolongata</i>   | <i>L.pro.</i>   | 0.30      |                              |
| <i>Calanus sinicus</i>                    | <i>C.sin.</i>   | 0.06      | <i>Noctiluca scintillans</i>       | <i>N.sci.</i>   | 0.22      |                              |
| <i>Oithona davisae</i>                    | <i>O.dav.</i>   | 0.09      | <i>Strombidium capitatum</i>       | <i>S.cap.</i>   | 0.10      |                              |
| <i>Paracalanus parvus</i>                 | <i>P.par.</i>   | 0.22      | <i>Strombidium caudispina</i>      | <i>S.cau.</i>   | 0.18      |                              |
| <i>Acartia steueri</i>                    | <i>A.ste.</i>   | 0.09      | <i>Strombidium</i> sp.             | <i>Sto.sp.</i>  | 0.18      |                              |
| <i>Amoebophrya</i> sp1.                   | <i>Amo.sp1.</i> | 0.21      | <i>Amoebophrya</i> sp2.            | <i>Amo.sp2.</i> | 0.17      | Endoparasitic dinoflagellate |
| <i>Amoebophrya</i> sp2.                   | <i>Amo.sp2.</i> | 0.07      | Other Syndiniales                  | Oth.Syn.        | 0.11      |                              |
| Other Syndiniales                         | Oth.Syn.        | 0.29      |                                    |                 |           |                              |
| <i>Ahrensia kielensis</i>                 | <i>A.kie.</i>   | 0.44      | <i>Amylibacter ulvae</i>           | <i>A.ulv.</i>   | 0.31      | Bacteria                     |
| <i>Amylibacter ulvae</i>                  | <i>A.ulv.</i>   | 0.32      | <i>Bizionia arctica</i>            | <i>B.arc.</i>   | 0.46      |                              |
| <i>Asciadiaceihabitans donghaensis</i>    | <i>A.don.</i>   | 0.25      | <i>Cribrihabitans marinus</i>      | <i>C.mar.</i>   | 0.36      |                              |
| <i>Bizionia arctica</i>                   | <i>B.arc.</i>   | 0.29      | <i>Euzebya tangerina</i>           | <i>E.tan.</i>   | 0.53      |                              |
| <i>Botrylloides leachi</i>                | <i>B.lea.</i>   | 0.06      | <i>Flaviramulus ichthyoenteri</i>  | <i>F.ich.</i>   | 0.23      |                              |
| <i>Cribrihabitans marinus</i>             | <i>C.mar.</i>   | 0.34      | <i>Fluviicola taffensis</i>        | <i>F.taf.</i>   | 0.24      |                              |
| <i>Cycloclasticus spirillensus</i>        | <i>C.spi.</i>   | 0.23      | <i>Lacinutrix gracilariae</i>      | <i>L.gra.</i>   | 0.54      |                              |
| <i>Flaviramulus ichthyoenteri</i>         | <i>F.ich.</i>   | 0.32      | <i>Lentibacter algarum</i>         | <i>L.alg.</i>   | 0.32      |                              |
| <i>Fluviicola taffensis</i>               | <i>F.taf.</i>   | 0.17      | <i>Lishizhenia caseinilytica</i>   | <i>L.cas.</i>   | 0.25      |                              |
| <i>Granulosicoccus antarcticus</i>        | <i>G.ant.</i>   | 0.19      | <i>Luminiphilus sylvensis</i>      | <i>L.syl.</i>   | 0.38      |                              |
| <i>Lentibacter algarum</i>                | <i>L.alg.</i>   | 0.36      | <i>Mesonia algae</i>               | <i>M.alg.</i>   | 0.35      |                              |
| <i>Lishizhenia caseinilytica</i>          | <i>L.cas.</i>   | 0.15      | <i>Methylophilus methylophilus</i> | <i>M.met.</i>   | 0.46      |                              |
| <i>Luminiphilus sylvensis</i>             | <i>L.syl.</i>   | 0.26      | <i>Nisaea nitritireducens</i>      | <i>N.nit.</i>   | 0.40      |                              |
| <i>Mesonia algae</i>                      | <i>M.alg.</i>   | 0.36      | <i>Novosphingobium acidiphilum</i> | <i>N.aci.</i>   | 0.31      |                              |
| <i>Methylophilus methylophilus</i>        | <i>M.met.</i>   | 0.31      | <i>Owenweeksia hongkongensis</i>   | <i>O.hon.</i>   | 0.37      |                              |
| <i>Nisaea nitritireducens</i>             | <i>N.nit.</i>   | 0.38      | <i>Planktomarina temperata</i>     | <i>P.tem.</i>   | 0.24      |                              |
| <i>Novosphingobium acidiphilum</i>        | <i>N.aci.</i>   | 0.35      | <i>Reinekea aestuarii</i>          | <i>R.aes.</i>   | 0.31      |                              |
| <i>Owenweeksia hongkongensis</i>          | <i>O.hon.</i>   | 0.37      | <i>Salinirepens amamiensis</i>     | <i>S.ama.</i>   | 0.25      |                              |
| <i>Phaeocystidibacter marisrubri</i>      | <i>P.mar.</i>   | 0.45      | <i>Sedimenticola thiotaurini</i>   | <i>S.thi.</i>   | 0.24      |                              |
| <i>Planktomarina temperate</i>            | <i>P.tem.</i>   | 0.22      | <i>Sedimentitalea todarodis</i>    | <i>S.tod.</i>   | 0.33      |                              |
| <i>Polaribacter huanghezhanensis</i>      | <i>P.hua.</i>   | 0.17      | <i>Tenacibaculum aiptasiae</i>     | <i>T.aip.</i>   | 0.21      |                              |
| <i>Pseudohongiella spirulinae</i>         | <i>P.spi.</i>   | 0.16      |                                    |                 |           |                              |
| <i>Tenacibaculum aiptasiae</i>            | <i>T.aip.</i>   | 0.13      |                                    |                 |           |                              |
| <i>Thiohalobacter thiohalobacter</i>      | <i>T.thi.</i>   | 0.18      |                                    |                 |           |                              |
| <i>Salinirepens amamiensis</i>            | <i>S.ama.</i>   | 0.27      |                                    |                 |           |                              |
| <i>Sedimenticola thiotaurini</i>          | <i>S.thi.</i>   | 0.32      |                                    |                 |           |                              |
| <i>Styela plicata</i>                     | <i>S.pli.</i>   | 0.17      |                                    |                 |           |                              |
| Uncultured Alpha-proteobacterium (OTU #2) | UAp#2           | 0.18      |                                    |                 |           |                              |

62

63 **Supplementary Table 6. Continued**

| 2016                                               |              |           | 2017                                        |              |           | Classification |
|----------------------------------------------------|--------------|-----------|---------------------------------------------|--------------|-----------|----------------|
| Factor                                             | Abbreviation | Node size | Factor                                      | Abbreviation | Node size |                |
| <i>Acanthocystis turfacea</i> chlorella virus 1    | AtcV1        | 0.30      | <i>Acanthamoeba polyphaga</i> moumouvirus   | ApmoV        | 0.76      | NCLDV's        |
| <i>Bathycoccus</i> sp. RCC1105 virus BpV1          | BpV1         | 0.57      | <i>Aureococcus anophagefferens</i> virus    | AaV          | 0.67      |                |
| <i>Cafeteria roenbergensis</i> virus BV-PW1        | CrVBV-PW1    | 0.65      | <i>Bathycoccus</i> sp. RCC1105 virus BpV1   | BpV1         | 0.37      |                |
| <i>Cedratvirus</i> A11                             | CV-A11       | 0.23      | <i>Cafeteria roenbergensis</i> virus BV-PW1 | CrVBV-PW1    | 0.56      |                |
| <i>Chrysochromulina ericina</i> virus              | CeV          | 0.50      | <i>Chrysochromulina ericina</i> virus       | CeV          | 0.52      |                |
| <i>Diachasmimorpha longicaudata</i> entomopoxvirus | DleV         | 0.07      | Dishui lake phycodnavirus 1                 | DlpV1        | 0.50      |                |
| <i>Diadromus pulchellus</i> ascovirus 4a           | DpaV4a       | 0.10      | <i>Emiliana huxleyi</i> virus 86            | EhV86        | 0.55      |                |
| Dishui lake phycodnavirus 1                        | DlpV1        | 0.10      | <i>Heterosigma akashiwo</i> virus 01        | HaV01        | 0.63      |                |
| <i>Ectocarpus siliculosus</i> virus 1              | EsV1         | 0.20      | Megavirus chiliensis                        | McV          | 0.73      |                |
| <i>Emiliana huxleyi</i> virus 86                   | EhV86        | 0.36      | <i>Micromonas</i> sp. RCC1109 virus MpV1    | MpV1         | 0.40      |                |
| <i>Eptesipox</i> virus                             | EpV          | 0.63      | <i>Micromonas pusilla</i> virus SP1         | MpV-SP1      | 0.43      |                |
| European catfish virus                             | EcV          | 0.11      | <i>Mimivirus terra2</i>                     | MVt2         | 0.70      |                |
| <i>Heterosigma akashiwo</i> virus 01               | HaV01        | 0.22      | <i>Mollivirus sibericum</i>                 | MsV          | 0.21      |                |
| Invertebrate iridovirus 22                         | IiV22        | 0.17      | Only Syngen Nebraska virus 5                | OSNV5        | 0.68      |                |
| Invertebrate iridescent virus 6                    | IiV6         | 0.16      | <i>Ostreococcus lucimarinus</i> virus 1     | OIV1         | 0.23      |                |
| <i>Lymphocystis</i> disease virus - isolate China  | LdV          | 0.63      | <i>Ostreococcus lucimarinus</i> virus OIV5  | OIV5         | 0.35      |                |
| <i>Lymphocystis</i> disease virus Sa               | LdVSA        | 0.08      | <i>Ostreococcus tauri</i> virus 2           | OtV2         | 0.30      |                |
| <i>Megavirus chiliensis</i>                        | McV          | 0.24      | <i>Pandoravirus dulcis</i>                  | PdV          | 0.37      |                |
| <i>Micromonas</i> sp. RCC1109 virus MpV1           | MpV1         | 0.36      | <i>Pandoravirus inopinatum</i>              | PiV          | 0.46      |                |
| <i>Micromonas pusilla</i> virus 12T                | MpV12T       | 0.65      | <i>Pandoravirus macleodensis</i>            | PmV          | 0.17      |                |
| <i>Micromonas pusilla</i> virus SP1                | MpV-SP1      | 0.36      | <i>Pandoravirus neocaledonia</i>            | PnV          | 0.48      |                |
| <i>Mimivirus terra2</i>                            | MVt2         | 0.63      | <i>Pandoravirus quercus</i>                 | PqV          | 0.49      |                |
| <i>Ostreococcus lucimarinus</i> virus OIV5         | OIV5         | 0.36      | <i>Pandoravirus salinus</i>                 | PsV          | 0.51      |                |
| <i>Ostreococcus mediterraneus</i> virus 1          | OmV1         | 0.25      | <i>Phaeocystis globosa</i> virus            | PgV          | 0.62      |                |
| Only Syngen Nebraska virus 5                       | OSNV5        | 0.58      | Yellowstone lake mimivirus                  | YlmV         | 0.36      |                |
| <i>Ostreococcus tauri</i> virus OtV5               | OtV5         | 0.13      |                                             |              |           |                |
| <i>Paramecium bursaria</i> chlorella virus 1       | PbcV1        | 0.36      |                                             |              |           |                |
| <i>Paramecium bursaria</i> chlorella virus CVA-1   | PbcV-CVA1    | 0.28      |                                             |              |           |                |
| <i>Paramecium bursaria</i> chlorella virus FR483   | PbcV-FR483   | 0.26      |                                             |              |           |                |
| <i>Paramecium bursaria</i> chlorella virus NY2A    | PbcV-NY2A    | 0.54      |                                             |              |           |                |
| <i>Paramecium bursaria</i> chlorella virus NYs1    | PbcV-NYs1    | 0.39      |                                             |              |           |                |
| <i>Phaeocystis globosa</i> virus                   | PgV          | 0.63      |                                             |              |           |                |
| <i>Pandoravirus dulcis</i>                         | PdV          | 0.13      |                                             |              |           |                |
| <i>Pandoravirus macleodensis</i>                   | PmV          | 0.30      |                                             |              |           |                |
| <i>Pandoravirus quercus</i>                        | PqV          | 0.44      |                                             |              |           |                |
| <i>Pandoravirus salinus</i>                        | PsV          | 0.32      |                                             |              |           |                |
| <i>Ranavirus maximus</i>                           | RmV          | 0.30      |                                             |              |           |                |
| <i>Trichoplusia</i> ascovirus 2c                   | TaV2c        | 0.32      |                                             |              |           |                |
| <i>Taterapox</i> virus                             | TpV          | 0.13      |                                             |              |           |                |
| <i>Trichoplusia ni</i> ascovirus 2c                | TnaV2c       | 0.32      |                                             |              |           |                |
| Yellowstone lake mimivirus                         | YlmV         | 0.23      |                                             |              |           |                |
| Yellowstone lake phycodnavirus 1                   | YlpV1        | 0.36      |                                             |              |           |                |
| Yellowstone lake phycodnavirus 3                   | YlpV3        | 0.45      |                                             |              |           |                |
| <i>Yokapox</i> virus                               | YpV          | 0.47      |                                             |              |           |                |

64

65

66 **Supplementary Table 7.** Description of LS correlations displayed of network analysis in Figure 7a.

| X             | Y               | LS     | Xs | Ys | Length | Delay time (d) | SPCC   | P <sub>SPCC</sub> |
|---------------|-----------------|--------|----|----|--------|----------------|--------|-------------------|
| Chl- <i>a</i> |                 | 0.727  | 2  | 1  | 16     | 4              | 0.706  | 0.002             |
| DIP           | <i>A.san.</i>   | 0.694  | 1  | 1  | 16     | 0              | 0.739  | 0.001             |
| Sal.          |                 | -0.582 | 1  | 1  | 16     | 0              | -0.866 | 0.000             |
| Temp.         |                 | 0.622  | 1  | 1  | 16     | 0              | 0.769  | 0.000             |
|               | PpV             | -0.898 | 1  | 1  | 16     | 0              | -0.834 | 0.000             |
|               | <i>H.rot.</i>   | -0.684 | 1  | 1  | 16     | 0              | -0.587 | 0.035             |
|               | <i>A.ste.</i>   | -0.581 | 1  | 1  | 16     | 0              | -0.510 | 0.075             |
|               | U.Str.          | -0.857 | 1  | 1  | 17     | 0              | -0.793 | 0.000             |
|               | <i>A.omo</i>    | -0.610 | 1  | 1  | 17     | 0              | -0.650 | 0.005             |
|               | <i>Amo.sp1.</i> | 0.722  | 1  | 2  | 16     | -2             | 0.594  | 0.015             |
|               | Oth.Syn.        | -0.660 | 1  | 1  | 17     | 0              | -0.823 | 0.000             |
|               | <i>N.aci.</i>   | -0.660 | 1  | 1  | 17     | 0              | -0.738 | 0.001             |
| <i>A.san.</i> | UAp #2          | 0.665  | 1  | 1  | 16     | 0              | 0.679  | 0.003             |
|               | <i>A.ulv.</i>   | -0.746 | 1  | 1  | 15     | 0              | -0.753 | 0.001             |
|               | <i>P.mar.</i>   | 0.686  | 1  | 2  | 13     | -2             | 0.575  | 0.020             |
|               | <i>M.alg.</i>   | -0.684 | 1  | 3  | 15     | -4             | -0.812 | 0.000             |
|               | <i>F.taf.</i>   | 0.665  | 1  | 3  | 15     | -2             | 0.595  | 0.025             |
|               | <i>S.ama.</i>   | -0.706 | 1  | 1  | 16     | 0              | -0.790 | 0.000             |
|               | <i>L.syl.</i>   | -0.689 | 1  | 2  | 16     | -2             | -0.737 | 0.004             |
|               | <i>C.spi.</i>   | -0.707 | 1  | 2  | 16     | -2             | -0.851 | 0.000             |
|               | <i>T.thi.</i>   | -0.556 | 1  | 2  | 16     | -2             | -0.855 | 0.000             |
|               | EsV1            | 0.638  | 1  | 3  | 15     | -4             | 0.502  | 0.067             |

67 Abbreviations: LS, local similarity; SPCC and P<sub>SPCC</sub> are the Spearman's Correlation Coefficient and the  
68 associated P-value, respectively for the OTUs listed. Delay indicates time-lag day. Xs and Ys note the day in  
69 which the LS correlation begins, and 'Length,' indicates the length of the LS correlation in day.  
70

71 **Supplementary Table 8.** Description of LS correlations displayed of network analysis in Figure 7b.

| X             | Y             | LS     | Xs | Ys | Length | Delay time (d) | SPCC   | P <sub>SPCC</sub> |
|---------------|---------------|--------|----|----|--------|----------------|--------|-------------------|
| pH            | <i>B.pra.</i> | -0.712 | 1  | 1  | 15     | 0              | 0.717  | 0.019             |
|               | <i>S.tod.</i> | 0.564  | 2  | 1  | 14     | 2              | 0.857  | 0.000             |
|               | <i>L.alg.</i> | -0.547 | 5  | 1  | 11     | 8              | -0.895 | 0.000             |
|               | <i>T.aip.</i> | -0.501 | 1  | 1  | 15     | 0              | -0.663 | 0.007             |
| <i>B.pra.</i> | <i>B.arc.</i> | 0.544  | 1  | 2  | 14     | -2             | 0.739  | 0.003             |
|               | <i>E.tan.</i> | 0.545  | 1  | 1  | 15     | 0              | 0.709  | 0.003             |
|               | OIV5          | -0.541 | 1  | 1  | 15     | 0              | -0.823 | 0.001             |
|               | OIV2          | -0.555 | 5  | 4  | 11     | 2              | -0.743 | 0.002             |

72 Abbreviations: LS, local similarity; SCC and P<sub>SCC</sub> are the Spearman's Correlation Coefficient and the associated  
73 P-value, respectively for the OTUs listed. Delay indicates time-lag day. Xs and Ys note the day in which the LS  
74 correlation begins, and 'Length,' indicates the length of the LS correlation in day.  
75

76 **Supplementary Table 9.** The list of the previous studies of algicidal bacteria.

| Strain name | Genus                    | Phylum               | Target phytoplankton                     | Killing Type | Reference |
|-------------|--------------------------|----------------------|------------------------------------------|--------------|-----------|
| ACEM 21     | <i>Cellulophaga</i>      |                      | Raphidophyceae, Dinoflagellate, Diatoms  | Indirect     | 5         |
| A5Y         | <i>Cytophaga</i>         |                      | Raphidophyceae, Diatoms.                 | Direct       | 6         |
| 41-DBG2     | <i>Cytophaga</i>         |                      | Dinoflagellate                           | Indirect     | 7         |
| N/D         | <i>Cytophaga</i>         |                      | Raphidophyceae,                          | Direct       | 8         |
| MC8         | <i>Cytophaga</i>         |                      | Raphidophyceae,                          | Direct       | 9         |
| J18/M01     | <i>Cytophaga</i>         |                      | Raphidophyceae, Diatoms.                 | Direct       | 10        |
| LR2         | <i>Cytophaga</i>         |                      | Dinoflagellate                           | Unknown      | 11        |
| AA8-2       | <i>Cytophaga</i>         | Bacteriodetes        | Dinoflagellate                           | Direct       | 12        |
| AMA-01      | <i>Cytophaga</i>         |                      | Dinoflagellate                           | Indirect     | 13        |
| 5N-3        | <i>Flavobacterium</i>    |                      | Dinoflagellate                           | Indirect     | 14        |
| C49         | <i>Flavobacterium</i>    |                      | Raphidophyceae,                          | Unknown      | 15        |
| SS98-5      | <i>Saprospira</i>        |                      | Diatoms                                  | Direct       | 16        |
| SS-K1       | <i>Saprospira</i>        |                      | Diatoms                                  | Direct       | 17        |
| ACEM 20     | <i>Zobellia</i>          |                      | Raphidophyceae, Dinoflagellate           | Indirect     | 5         |
| Unknown     | unknown                  |                      | Diatoms                                  | Unknown      | 18        |
| K12         | <i>Alteromonas</i>       |                      | Diatoms                                  | Indirect     | 19        |
| SR-14       | <i>Alteromonas</i>       |                      | Diatoms                                  | Indirect     | 20        |
| ANSW2-2     | <i>Alteromonas</i>       |                      | Dinoflagellate                           | Indirect     | 7         |
| E401        | <i>Alteromonas</i>       |                      | Raphidophyceae, Dinoflagellate           | Indirect     | 21        |
| MC27        | <i>Alteromonas</i>       |                      | Raphidophyceae                           | Indirect     | 22        |
| GY21        | <i>Alteromonas</i>       |                      | Raphidophyceae                           | Indirect     | 22        |
| GY9501      | <i>Alteromonas</i>       |                      | Rap., Dinoflagellate                     | Indirect     | 23        |
| S           | <i>Alteromonas</i>       |                      | Raphidophyceae, Dinoflagellate, Diaotms. | Indirect     | 24        |
| K           | <i>Alteromonas</i>       |                      | Raphidophyceae, Dinoflagellate, Diaotms. | Indirect     | 24        |
| D           | <i>Alteromonas</i>       |                      | Raphidophyceae, Dinoflagellate, Diaotms. | Indirect     | 24        |
| A25         | <i>Pseudoalteromonas</i> |                      | Diatoms                                  | Indirect     | 25        |
| A28         | <i>Pseudoalteromonas</i> |                      | Raphidophyceae, Diatoms                  | Indirect     | 26        |
| Y           | <i>Pseudoalteromonas</i> |                      | Raphidophyceae, Dinoflagellate           | Indirect     | 27        |
| ACEM 4      | <i>Pseudoalteromonas</i> | Gamma-proteobacteria | Raphidophyceae, Dinoflagellate           | Indirect     | 5         |
| R           | <i>Pseudoalteromonas</i> |                      | Raphidophyceae, Dinoflagellate, Diatoms  | Indirect     | 24        |
| AMA-02      | <i>Pseudoalteromonas</i> |                      | Dinoflagellate                           | Indirect     | 13        |
| T827/2B     | <i>Pseudomonas</i>       |                      | Diatoms                                  | Indirect     | 28        |
| LG-2        | <i>Pseudomonas</i>       |                      | Dinoflagellate                           | Indirect     | 29        |
| EHK-1       | <i>Pseudomonas</i>       |                      | Dinoflagellate                           | Indirect     | 30        |
| G42         | <i>Pseudomonas</i>       |                      | Raphidophyceae                           | Unknown      | 15        |
| O-2-2       | <i>Pseudomonas</i>       |                      | Raphidophyceae, Dinoflagellate           | Indirect     | 31        |
| T27         | <i>Vibrio</i>            |                      | Raphidophyceae, Dinoflagellate           | Unknown      | 32        |
| A47         | <i>Vibrio</i>            |                      | Raphidophyceae                           | Unknown      | 15        |
| B42         | <i>Vibrio</i>            |                      | Diatoms                                  | Unknown      | 15        |
| C4          | <i>Vibrio</i>            |                      | Raphidophyceae, Diatoms                  | Unknown      | 15        |
| G62         | <i>Vibrio</i>            |                      | Raphidophyceae, Dinoflagellate           | Unknown      | 15        |
| AMA-03      | <i>Ruegeria</i>          |                      | Dinoflagellate                           | Indirect     | 13        |
| IRI-60      | <i>Shewanella</i>        |                      | Dinoflagellate                           | Direct       | 33        |
| ACEM 32     | <i>Bacillus</i>          | Firmicutes           | Raphidophyceae, Dinoflagellate           | Indirect     | 5         |
| SY-1        | <i>Bacillus</i>          |                      | Dinoflagellate                           | Indirect     | 34        |
| ACEM 22     | <i>Planomicrobium</i>    |                      | Raphidophyceae, Dinoflagellate           | Indirect     | 5         |
| LG-1        | <i>Micrococcus</i>       | Actinobacteria       | Dinoflagellate                           | Indirect     | 35        |
| LG-5        | <i>Micrococcus</i>       |                      | Dinoflagellate                           | Indirect     | 36        |
| SY-13       | <i>Micrococcus</i>       |                      | Dinoflagellate                           | Indirect     | 37        |
| OT-1        | <i>Kordia</i>            |                      | Diatoms                                  | direct       | 38        |
| H519S5-4    | Unknown                  | Unknown              | Raphidophyceae, Dinoflagellate., Diatoms | indirect     | 39        |
| H605S5-15   | Unknown                  |                      | Raphidophyceae, Dinoflagellate, Diatoms  | indirect     | 39        |
| H605S5-22   | Unknown                  |                      | Raphidophyceae, Dinoflagellate, Diatoms  | indirect     | 39        |

77

## 78 Supplementary References

- 79 1. Herlemann DPR, Labrenz M, Jürgens K, Bertilsson S, Waniek JJ, Andersson AF. Transitions in bacterial  
80 communities along the 2000 km salinity gradient of the Baltic Sea. *ISME J* 2011; **5**; 1571-1579.
- 81 2. Ogihara H, Kawarai T, Furukawa S, Miyao S, Yamasaki M. Microfloral and chemical changes of salted  
82 pickles (Suguki) during its manufacturing process. *Jpn J Food Microbiol* 2009; **26**; 98–106.
- 83 3. Jung SW, Kang D, Kim HJ, Shin HH, Park JS, Park SY, Lee TK. Mapping distribution of cysts of recent  
84 dinoflagellate and *Cochlodinium polykrikoides* using next-generation sequencing and morphological  
85 approaches in South Sea, Korea. *Scientific Reports* 2018; **7**; 7011.
- 86 4. Stoeck T, Bass D, Nebel M, Christen R, Jones MD, Breiner HW, Richards TA. Multiple marker parallel tag  
87 environmental DNA sequencing reveals a highly complex eukaryotic community in marine anoxic water.  
88 *Mol Ecol* 2010; **19**; 21–31.
- 89 5. Skerratt JH, Bowman JP, Hallegraeff GM, James S, Nichols PD. Algicidal bacteria associated with blooms  
90 of a toxic dinoflagellate in a temperate Australian estuary. *Mar Ecol Prog Ser* 2002; **244**; 1-15.
- 91 6. Mitsutani A, Takesue K, Kirita M, Ishida Y. Lysis of *Skeletonema costatum* by *Cytophaga* sp. isolated from  
92 the coastal water of the Ariake Sea. *Nippon Suisan Gakkaishi* 1992; **58**; 2159-2169.
- 93 7. Doucette GJ, McGovern ER, Babinchak JA. Algicidal bacteria active against *Gymnodinium breve*  
94 (Dinophyceae). I. Bacterial isolation and characterization of killing activity. *J Phycol* 1999; **35**; 1447-1457.
- 95 8. Furuki M. Ecology of the bacteria that destroys *Chattonella*. *Environ. Manag End Coast Seas Newslett*  
96 1993; **2**; 8.
- 97 9. Yoshinaga I, Kim MC, Katanozaka N, Imai I, Uchida A, Ishida Y. Population structure of algicidal marine  
98 bacteria targeting the red tide-forming alga *Heterosigma akashiwo* (Raphidophyceae), determined by  
99 restriction fragment length polymorphism analysis of the bacterial 16S ribosomal RNA genes. *Mar Ecol*  
100 *Prog Ser* 1998; **170**; 33-44.
- 101 10. Imai I, Ishida Y, Sawayama S, Hata Y. Isolation of a marine gliding bacterium that kills *Chattonella antiqua*  
102 (Raphidophyceae). *Nippon Suisan Gakkaishi* 1991; **57**; 1409.
- 103 11. Toncheva-Panova T, Ivanova J. A bacterial pathogen of *Rhodella reticulata*. *J Appl Microbiol* 1997; **83**;



- 104 707-711.
- 105 12. Nagasaki K, Yamaguchi M, Imai I. Algicidal activity of a killer bacterium against the red-tide dinoflagellate  
106 *Heterocapsa circularisquama* isolated from Ago Bay, Japan. *Nippon Suisan Gakkaishi* 2000; **66**; 666-673.
- 107 13. Amaro AM, Fuentes MS, Ogalde SR, Venegas JA, Suárez-Isla BA. Identification and characterization of  
108 potentially algal-lytic marine bacteria strongly associated with the toxic dinoflagellate *Alexandrium*  
109 *catenella*. *J Eukaryot Microbiol* 2005; **52**; 191-200.
- 110 14. Fukami K, Yuzawa A, Nishijima T, Hata Y. Isolation and properties of a bacterium inhibiting the growth of  
111 *Gymnodinium nagasakiense*. *Nippon Suisan Gakkaishi* 1992; **58**; 1073-1077.
- 112 15. Yoshinaga I, Kawai T, Ishida Y. Analysis of algicidal ranges of the bacteria killing the marine dinoflagellate  
113 *Gymnodinium mikimotoi* isolated from Tanabe Bay. *Japan Fish Sci* 1997; **63**; 94-98.
- 114 16. Furusawa G, Yoshikawa T, Yasuda A, Sakata T. Algicidal activity and gliding motility of *Saprospira* sp.  
115 SS98-5. *Can J Microbiol* 2003; **49**; 92-100.
- 116 17. Sakata T. Occurrence of marine *Saprospira* sp. possessing algicidal activity for diatoms. *Nippon Suisan*  
117 *Gakkaishi* 1990; **56**; 1165.
- 118 18. Chan AM, Kacsmarska I, Suttle CA. Isolation and characterization of a species-specific bacterial pathogen  
119 which lyses the marine diatom *Navicula pulchripora*. p. 121. In: Abstract of American Society of  
120 Limnology and Oceanography. Aquatic Sciences Meeting, Santa Fe, New Mexico, 10-14 February (1997).
- 121 19. Nagai S, Imai I. Killing of a giant diatom *Coscinodiscus wailesii* Gran by a marine bacterium *Alteromonas*  
122 sp. isolated from the Seto Inland Sea of Japan. p. 402-405. In: Reguera B, Blanco J, Fernández ML, Wyatt  
123 T. (eds.), Harmful Algae. Xunta de Galicia and Intergovernmental Oceanographic Commission of UNESCO  
124 (1998).
- 125 20. Kim JH, Park JH, Song YH, Chang DS. Isolation and characterization of the marine bacterium,  
126 *Alteromonas* sp. SR-14 inhibiting the growth of diatom *Chaetoceros* species. *J Korean Fish Soc* 1990; **32**;  
127 155-159.

- 128 21. Yoshinaga I, Kawai T, Ishida Y. Lysis of *Gymnodinium nagasakiense* by marine bacteria. P. 687-692. In:  
129 Lassus P, Arzul G, Erard E, Gentien P, Marcaillou C. (eds.), Harmful Marine Algal Blooms. Lavoisier  
130 Science Publ., Paris. (1995).
- 131 22. Yamamoto Y, Kouchiwa T, Hodoki Y, Hotta K, Uchida H, Harada K. Distribution and identification of  
132 actinomycetes lysing cyanobacteria in a eutrophic lake. *J Appl Phycol* 1998; **10**; 391-397.
- 133 23. Kuroda N, Yoshinaga I, Uchida A. How an algicidal bacterium (*Alteromonas* sp.) kills *Heterosigma*  
134 *akashii* (Raphidophyceae) and other algae? p. 157. In: Abstract of Ninth International Conference on  
135 Harmful Algal Blooms. Hobart, Tasmania, 7–11 February (2000).
- 136 24. Imai I, Ishida Y, Sakaguchi K, Hata Y. Algicidal marine bacteria isolated from northern Hiroshima Bay.  
137 Japan. *Fish Sci* 1995; **61**; 628-636.
- 138 25. Mitsutani A, Yamasaki I, Kitaguchi H, Kato J, Ueno S, Ishida Y. Analysis of algicidal proteins of a diatom-  
139 lytic marine bacterium *Pseudoalteromonas* sp. strain A25 by two-dimensional electrophoresis. *Phycologia*  
140 2001; **40**; 286-291.
- 141 26. Lee SO, Kato J, Takiguchi N, Kuroda A, Ikeda T, Mitsutani A, Ohtake H. Involvement of an extracellular  
142 protease in algicidal activity of the marine bacterium *Pseudoalteromonas* sp. strain A28. *Appl Environ*  
143 *Microbiol* 2000; **66**; 4334-4339.
- 144 27. Lovejoy C, Bowman JP, Hallegraeff GM. Algicidal effects of a novel marine *Pseudoalteromonas* isolate  
145 (class Proteobacteria, gamma subdivision) on harmful algal bloom species of the genera *Chattonella*,  
146 *Gymnodinium*, and *Heterosigma*. *Appl Environ Microbiol* 1998; **64**; 2806-2813.
- 147 28. Baker KH, Herson DS. Interaction between the diatom *Thalassiosira pseudonana* and an associated  
148 pseudomonad in a mariculture system. *Appl Environ Microbiol* 1978; **35**; 791-796.
- 149 29. Lee WJ, Park YT. Isolation of marine bacteria killing red tide microalgae II. Isolation and algicidal  
150 properties of *Pseudomonas* sp. LG-2 possessing killing activity for dinoflagellate, *Prorocentrum micans*. *J*  
151 *Korean Fish Soc* 1988; **31**; 852-858.
- 152 30. Kitaguchi H, Hiragushi N, Mitsutani A, Yamaguchi M, Ishida Y. Isolation of an algicidal bacterium with

- 153 activity against the harmful dinoflagellate *Heterocapsa circularisquama* (Dinophyceae). *Phycologia* 2001;  
154 **40**; 275-279.
- 155 31. Wang X, Gong L, Liang S, Han X, Zhu C, Li Y. Algicidal activity of rhamnolipid biosurfactants produced  
156 by *Pseudomonas aeruginosa*. *Harmful algae* 2005; **4**; 433-443.
- 157 32. Ishio S, Mangindaan RE, Kuwahara M, Nakagawa H. A bacterium hostile to flagellates: identification of  
158 species and characters. p. 205-208. In: Okaichi T, Anderson D, Nemoto T. (eds.), Red Tides: Biology,  
159 Environmental Science, and Toxicology. Elsevier Science Publishing Co. (1989).
- 160 33. Hare CE, Demir E, Coyne KJ, Craig Cary S, Kirchman DL, Hutchins DA. A bacterium that inhibits the  
161 growth of *Pfiesteria piscicida* and other dinoflagellates. *Harmful Algae* 2005; **4**; 221-234.
- 162 34. Jeong SY, Ishida K, Ito Y, Okada S, Murakami M. Bacillamide, a novel algicide from the marine bacterium,  
163 *Bacillus* sp. SY-1, against the harmful dinoflagellate, *Cochlodinium polykrikoides*. *Tetrahedron lett* 2003;  
164 **44**; 8005-8007.
- 165 35. Park YT, Park JB, Chung SY, Song BC, Lim WA, Kim CH, Lee WJ. Isolation of marine bacteria killing red  
166 tide microalgae I. Isolation and algicidal properties of *Micrococcus* sp. LG-1 possessing killing activity for  
167 harmful dinoflagellate, *Cochlodinium polykrikoides*. *J Korean Fish Soc* 1988; **31**; 767-773.
- 168 36. Jeong SY, Park YT, Kim MC, Choi SC, Seong HK, Kim JY, Kim TU, Lee WJ. Isolation of marine bacteria  
169 killing red tide microalgae. *J Korean Fish Soc* 1999; **33**; 339-347.
- 170 37. Kim MJ, Jeong SY, Lee SJ. Isolation, identification, and algicidal activity of marine bacteria against  
171 *Cochlodinium polykrikoides*. *J Appl Phycol* 2008; **20**; 1069-1078.
- 172 38. Sohn JH, Lee JH, Yi HN, Chun JS, Bae KS, Ahn TY, Kim SJ. *Kordia algicida* gen. nov., sp. nov., an  
173 algicidal bacterium isolated from red tide. *Int J Syst Evol Microbiol* 2004; **54**; 675-680.
- 174 39. Kim MC, Yu HS, Ok MS, Kim CH, Chang DS. The activities and characteristics of algicidal bacteria in  
175 Chindong bay. *J Korean Fish Soc* 1999; **32**; 359-367.
